# Supplementary material for: Inequalities in Access to Mental Health Treatment by Australian Youths During the COVID-19 Pandemic
Source: Atypon-hosted journal article supplement (doi:10.1176/appi.ps.20220345), 2022-11-29
Supplement: appi.ps.20220345.ds001.pdf [file appi.ps.20220345.ds001.pdf]

## Detailed statistical methods

### *Interrupted time series models*

An interrupted time series model for the number of services delivered at time  $t$ ,  $Y_t$ , can be modelled using the following form:

$$Y_t \sim \text{Poisson}(\mu_t)$$

$$\log(\mu_t) = \beta_0 + \beta_1 t + \beta_2 \text{COVID}_t + \beta_3 \text{Quarter}_t + \log(\text{ERP}_t)$$

In this model, we evaluate the interrupting effect of COVID-19 during the year 2020 with the term  $\text{COVID}_t$  ( $\text{COVID}_t = 1$  for 2020 and  $\text{COVID}_t = 0$  otherwise). This model also controls for a linear long-term trend (the year quarter since the start of the time series,  $t = 2011, 2011.25, 2011.5 \dots$ ) and seasonality (categorical variable for four quarters of the year,  $\text{Quarter} = 1^{\text{st}}, 2^{\text{nd}}, 3^{\text{rd}}$  and  $4^{\text{th}}$ ). The estimated residential population at time  $t$  is used as an offset variable ( $\text{ERP}_t$ ).

As overdispersion (variance exceeds the mean) is presented in almost all series, the quasi-Poisson model was used instead of the standard Poisson regression. The quasi-Poisson model is a generalized linear model which applies a quasi-likelihood relaxing the equal model mean and variance assumption (1), through the variance formula:

$$\text{Var}(Y_t) = \phi \mu_t$$

$\phi$  is the dispersion parameter ( $\phi > 1$  when there is over-dispersion). Whilst the coefficient estimates remain the same, the updated variance formula provides more accurate and conservative standard errors for these estimates.

Strong temporal residual autocorrelations were found in about 12% of time series, using the Box-Pierce test (2), which mostly related to localised nonlinearities (departing from linearity for a few continuous data points) driven by unobserved factors such as changes in services availability. When not controlled, the residual autocorrelations may cause an underestimation of variance of estimated coefficients (3). In most of these series, strong autocorrelation was only found at lag 1 when inspecting with autocorrelation function (ACF) and a partial autocorrelation function (PACF) plot. As a result, the autoregressive correlation structure model at lag 1,  $AR(1)$ , was in models presented with strong evidence of residual autocorrelations (p-value  $< 0.05$  for Box-Pierce test).

The  $\beta_2$  parameter models the single level change in 2020 due to the interruption of the COVID-19 pandemic in Australia. This impact model is depicted in an illustration Figure below.

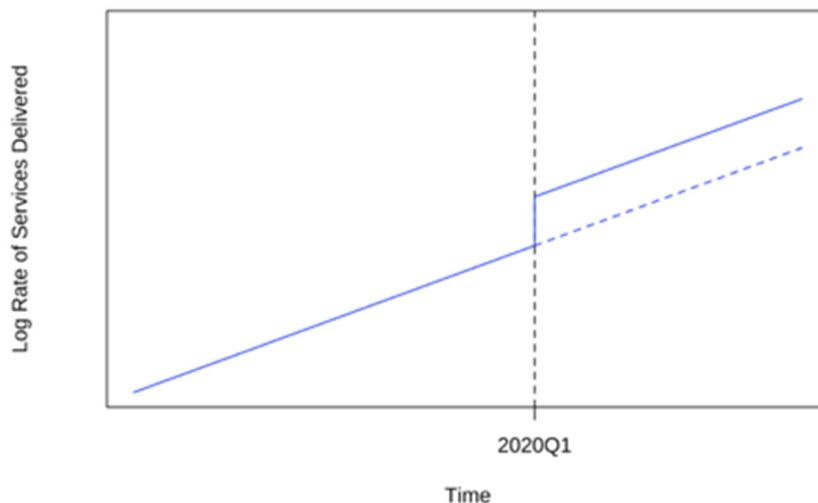

This model was selected to model the average change in 2020 compared to the historical trend. Whilst there is reason to believe a possible change of slope since 2020, it is impractical to estimate both a change in level and slope with the small number of observations since 2020.

### ***Meta-analysis***

The COVID-19 interruption effect coefficient,  $\beta_2$ , estimated for all SA3s were pooled using random effects meta-analysis for each population. Results were expressed as the exponential of the pooled coefficient, which represents RR. Restricted maximum likelihood (REML) estimation was used to generate the coefficient estimates in order to produce unbiased estimates of the variance and covariance parameters that make up the AR(1) correlation structure (4). Test statistics for the meta-analysis were calculated using the Knapp-Hartung method, which has been shown to produce lower type I error rates when there are many coefficient estimates (SA3s) with unequal population sizes and between-study heterogeneity, as is evident in this study (5).

### ***Meta-regression***

A similar model is used for meta-regression to establish its relationships with location (metropolitan vs. regional), level of socio-economic advantage and disadvantage (IRSAD score), and state (Victoria vs. the rest of Australia). Letting  $\hat{\beta}_2^i$  be the interruption effect estimate for SA3  $i$  for a specific population the meta-regression model is given by:

$$\hat{\beta}_2^i = \alpha_0 + \alpha_1 \text{Regional}_i + \alpha_2 \text{IRSAD}_i + \alpha_3 \text{Victoria}_i + u_i + \epsilon_i$$

The covariates  $\text{Regional}_i$  and  $\text{Victoria}_i$  are binary variables with baselines “Metropolitan” and “Rest of Australia” respectively.  $\text{IRSAD}_i$  represents the IRSAD score for SA3  $i$  centred on the Australian mean IRSAD score and expressed per 100 units. The coefficients satisfy  $\alpha_0, \alpha_1, \alpha_2, \alpha_3 \in \mathbb{R}$ . The term  $u_i$  represents variability due to differences (heterogeneity) in true pandemic effects between SA3s. The term  $\epsilon_i$  measures the sampling error – the variability in that SA3 and subgroup’s interruption effect due to not being able to sample all relevant 12-25-year-olds perfectly accurately or at all.

### ***Estimation methods***

Quasi-Poisson AR(1) regression models were estimated using penalised quasiliikelihood (PQL) with the “glmmPQL” function from the “MASS” library. As there were limited data points in each series, maximum likelihood estimation may suffer from small sample bias with complicated models (6). In this case, penalised maximum likelihood estimation can be a better choice (6). Sensitivity analyses were also conducted using “glm” function in “stats” library without AR(1) autocorrelation structure. Meta-analysis and meta-regression models were estimated using the “rma” function from the “metafor” library. All analysis codes can be found on the GitHub repository: [https://carolinexgao.github.io/MBS\\_COVID](https://carolinexgao.github.io/MBS_COVID)

## Supplementary tables and figures

### Figure S1

Distribution of IRSAD scores (A: cumulative distribution and B: histogram) across 331 SA3 areas included in the study (A) cumulative distribution (B) histogram

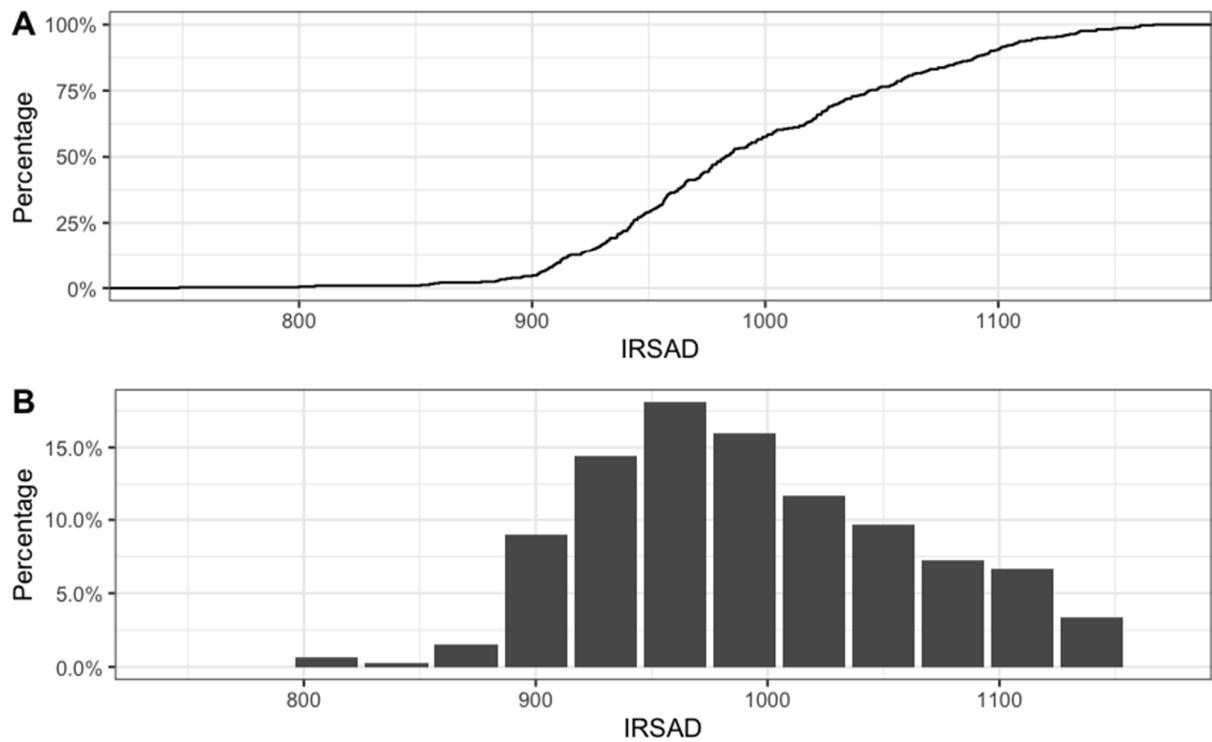

**Table S1**

Medicare Benefit Schedule (MBS) mental health related items

| <b>MBS Group</b> | <b>Group Description</b>                                                                                           | <b>Items</b>                                                                                                                                                                                                                                                                                         |
|------------------|--------------------------------------------------------------------------------------------------------------------|------------------------------------------------------------------------------------------------------------------------------------------------------------------------------------------------------------------------------------------------------------------------------------------------------|
| A06              | Group therapy                                                                                                      | 170, 171, 172                                                                                                                                                                                                                                                                                        |
| A07              | Acupuncture and non-specialist practitioner items*                                                                 | 221, 222, 223, 272, 276, 277, 279, 281, 282, 283, 285, 286, 287, 371, 372, 894, 896, 898                                                                                                                                                                                                             |
| A08              | Consultant psychiatrist attendances to which no other item applies                                                 | 288, 289, 291, 293, 296, 297, 299, 300, 302, 304, 306, 308, 310, 312, 314, 316, 318, 319, 320, 322, 324, 326, 328, 330, 332, 334, 336, 338, 342, 344, 346, 348, 350, 352, 353, 355, 356, 357, 358, 359, 361, 364, 366, 367, 369, 370                                                                 |
| A15              | GP management plans, team care arrangements, multidisciplinary care plans                                          | 855, 857, 858, 861, 864, 866                                                                                                                                                                                                                                                                         |
| A30              | Medical practitioner (including a general practitioner, specialist or consultant physician) telehealth attendances | 2121, 2150, 2196                                                                                                                                                                                                                                                                                     |
| A20              | GP mental health treatment                                                                                         | 2700, 2701, 2702, 2710, 2712, 2713, 2715, 2717, 2719, 2721, 2723, 2725, 2727, 2729, 2731                                                                                                                                                                                                             |
| M03              | Allied health services                                                                                             | 10956, 10968                                                                                                                                                                                                                                                                                         |
| T01              | Miscellaneous therapeutic procedures                                                                               | 14224                                                                                                                                                                                                                                                                                                |
| M06              | Psychological therapy services                                                                                     | 80000, 80001, 80005, 80010, 80011, 80015, 80020, 80021                                                                                                                                                                                                                                               |
| M07              | Focused psychological strategies (allied mental health)                                                            | 80100, 80101, 80105, 80110, 80111, 80115, 80120, 80121, 80125, 80126, 80130, 80135, 80136, 80140, 80145, 80146, 80150, 80151, 80155, 80160, 80161, 80165, 80170, 80171                                                                                                                               |
| M11              | Allied health services for indigenous Australians who have had a health check                                      | 81325, 81355                                                                                                                                                                                                                                                                                         |
| M10              | Autism, pervasive developmental disorder and disability services                                                   | 82000, 82005, 82010, 82015, 82020, 82025, 82030, 82035                                                                                                                                                                                                                                               |
| M16              | Eating disorders services                                                                                          | 82350, 82351, 82352, 82353, 82354, 82355, 82356, 82357, 82358, 82359, 82360, 82361, 82362, 82363, 82364, 82365, 82366, 82367, 82368, 82369, 82370, 82371, 82372, 82373, 82374, 82375, 82376, 82377, 82378, 82379, 82380, 82381, 82382, 82383                                                         |
| A36              | Eating disorder services                                                                                           | 90250, 90251, 90252, 90253, 90254, 90255, 90256, 90257, 90260, 90261, 90262, 90263, 90264, 90265, 90266, 90267, 90268, 90269, 90271, 90272, 90273, 90274, 90275, 90276, 90277, 90278, 90279, 90280, 90281, 90282                                                                                     |
| M17              | Bushfire recovery access initiative - psychologist services and allied health focused psychological strategies     | 91000, 91001, 91005, 91010, 91011, 91015, 91100, 91101, 91105, 91110, 91111, 91115, 91125, 91126, 91130, 91135, 91136, 91140, 91150, 91151, 91155, 91160, 91161, 91165                                                                                                                               |
| M18              | COVID-19 allied health telehealth services                                                                         | 91166, 91167, 91169, 91170, 91172, 91173, 91175, 91176, 91181, 91182, 91183, 91184, 91185, 91186, 91187, 91188, 93032, 93033, 93035, 93036, 93040, 93041, 93043, 93044, 93074, 93076, 93079, 93084, 93087, 93092, 93095, 93100, 93103, 93108, 93110, 93113, 93118, 93121, 93126, 93129, 93134, 93137 |

| <b>MBS Group</b> | <b>Group Description</b>                                                                           | <b>Items</b>                                                                                                                                                                                                                                                                                                                                                                                                                                                                                                                                                                                                                                                                                                 |
|------------------|----------------------------------------------------------------------------------------------------|--------------------------------------------------------------------------------------------------------------------------------------------------------------------------------------------------------------------------------------------------------------------------------------------------------------------------------------------------------------------------------------------------------------------------------------------------------------------------------------------------------------------------------------------------------------------------------------------------------------------------------------------------------------------------------------------------------------|
| A39              | Bushfire recovery access initiative - GP and medical practitioner focused psychological strategies | 91283, 91285, 91286, 91287, 91371, 91372, 91721, 91723, 91725, 91727, 91729, 91731                                                                                                                                                                                                                                                                                                                                                                                                                                                                                                                                                                                                                           |
| A40              | COVID-19 services                                                                                  | 91818, 91819, 91820, 91821, 91827, 91828, 91829, 91830, 91831, 91837, 91838, 91839, 91840, 91841, 91842, 91843, 91844, 91845, 92112, 92113, 92114, 92115, 92116, 92117, 92118, 92119, 92120, 92121, 92122, 92123, 92124, 92125, 92126, 92127, 92128, 92129, 92130, 92131, 92132, 92133, 92134, 92135, 92146, 92147, 92148, 92149, 92150, 92151, 92152, 92153, 92154, 92155, 92156, 92157, 92158, 92159, 92160, 92161, 92162, 92163, 92166, 92167, 92170, 92171, 92172, 92173, 92176, 92177, 92178, 92179, 92182, 92184, 92186, 92188, 92194, 92196, 92198, 92200, 92434, 92435, 92436, 92437, 92455, 92456, 92457, 92458, 92459, 92460, 92474, 92475, 92476, 92477, 92495, 92496, 92497, 92498, 92499, 92500 |
| A41              | COVID-19 additional focused psychological strategies                                               | 93300, 93301, 93302, 93303, 93304, 93305, 93306, 93307, 93308, 93309, 93310, 93311                                                                                                                                                                                                                                                                                                                                                                                                                                                                                                                                                                                                                           |
| M25              | COVID-19 additional psychological therapy services                                                 | 93330, 93331, 93332, 93333, 93334, 93335                                                                                                                                                                                                                                                                                                                                                                                                                                                                                                                                                                                                                                                                     |
| M26              | COVID-19 additional focused psychological strategies (allied mental health)                        | 93350, 93351, 93352, 93353, 93354, 93355, 93356, 93357, 93358, 93359, 93360, 93361, 93362, 93363, 93364, 93365, 93366, 93367                                                                                                                                                                                                                                                                                                                                                                                                                                                                                                                                                                                 |

\*Non-Specialist Practitioner Items for mental health services from the A7 Group were included, for example, Medical Practitioner Provision of Focussed Psychological Strategies (Items 283 to 287, 371 and 372).

**Figure S2**

Boxplot of SA3 level quarterly MBS mental health service use rates among young people (age 12-25) in 2019 and 2020.

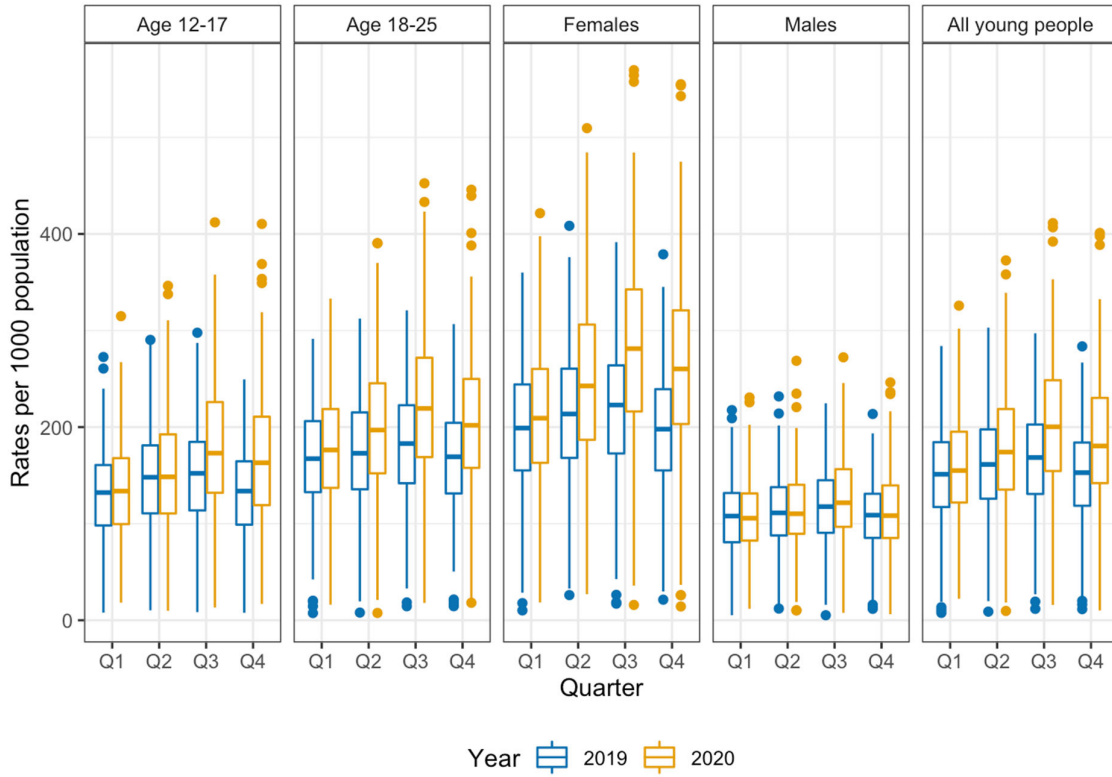

**Figure S3**

Geospatial distribution of annual MBS mental health service use rate per 1000 population among young people (age 12-25) in 2020 by SA3.

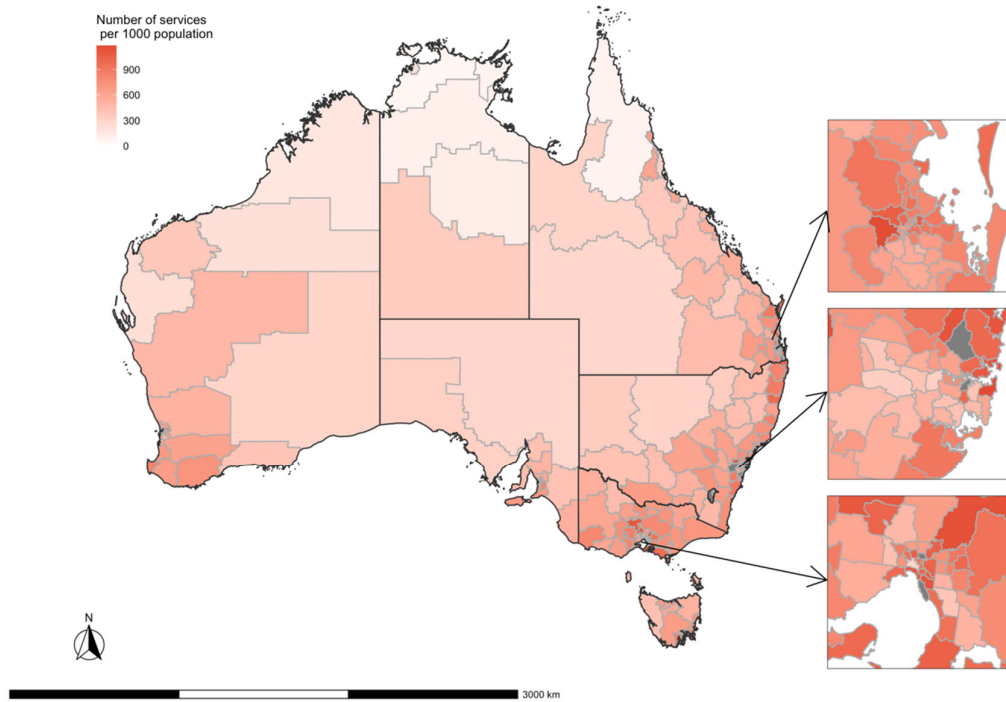



**Figure S4**

Trends of MBS mental health quarterly service use rates (per 1000 population) among young people (age 12-25) for individual SA3 area. The superimposed red line indicates the mean rates across all SA3 areas.

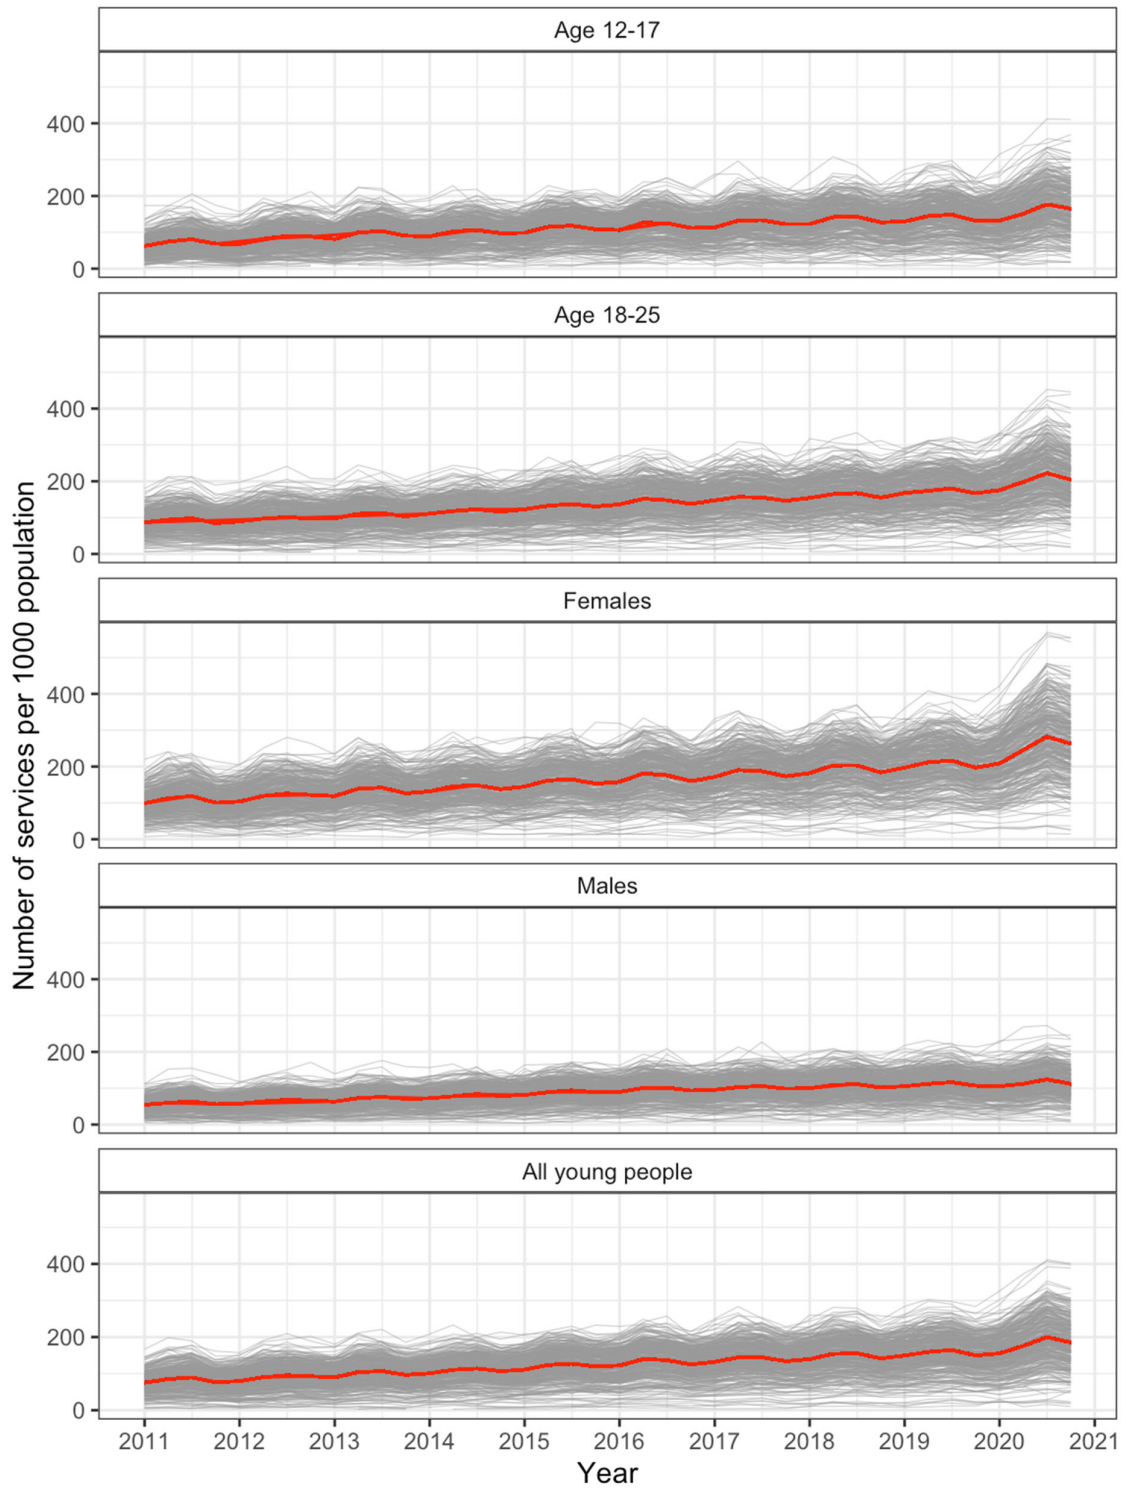

**Table S2**

Distribution (median and interquartile range: Q1-Q3) of MBS service use rate (services per 1000 population per year across all SA3) by state in the pre-pandemic year (2019) and pandemic year (2020) for all young people (age 12-25), and age and sex subgroups.

| <b>Characteristic</b> | <b>State</b> | <b>2019</b>      | <b>2020</b>        | <b>Percentage increase</b> |
|-----------------------|--------------|------------------|--------------------|----------------------------|
| Age 12-17             | Victoria     | 636 (508, 733)   | 655 (511, 855)     | 9% (2%, 17%)               |
|                       | Other        | 553 (413, 680)   | 619 (457, 783)     | 13% (5%, 21%)              |
| Age 18-25             | Victoria     | 765 (610, 870)   | 886 (739, 1,071)   | 21% (15%, 26%)             |
|                       | Other        | 682 (525, 839)   | 761 (595, 972)     | 14% (9%, 20%)              |
| Females               | Victoria     | 921 (751, 1,089) | 1,155 (933, 1,405) | 26% (16%, 31%)             |
|                       | Other        | 813 (639, 999)   | 963 (744, 1,205)   | 19% (13%, 27%)             |
| Males                 | Victoria     | 474 (405, 550)   | 465 (408, 596)     | 3% (-3%, 8%)               |
|                       | Other        | 435 (335, 536)   | 439 (344, 556)     | 3% (-3%, 9%)               |
| All young people      | Victoria     | 695 (560, 817)   | 796 (659, 984)     | 17% (10%, 22%)             |
|                       | Other        | 612 (482, 757)   | 685 (540, 874)     | 13% (8%, 20%)              |

**Figure S5**

Comparison between estimated RRs for COVID-19 in SA3s (A) in Victoria compared with other states and (B) in metropolitan SA3s compared regional SA3s. Note: data from four SA3 areas from Northern Territory were excluded as outliers.

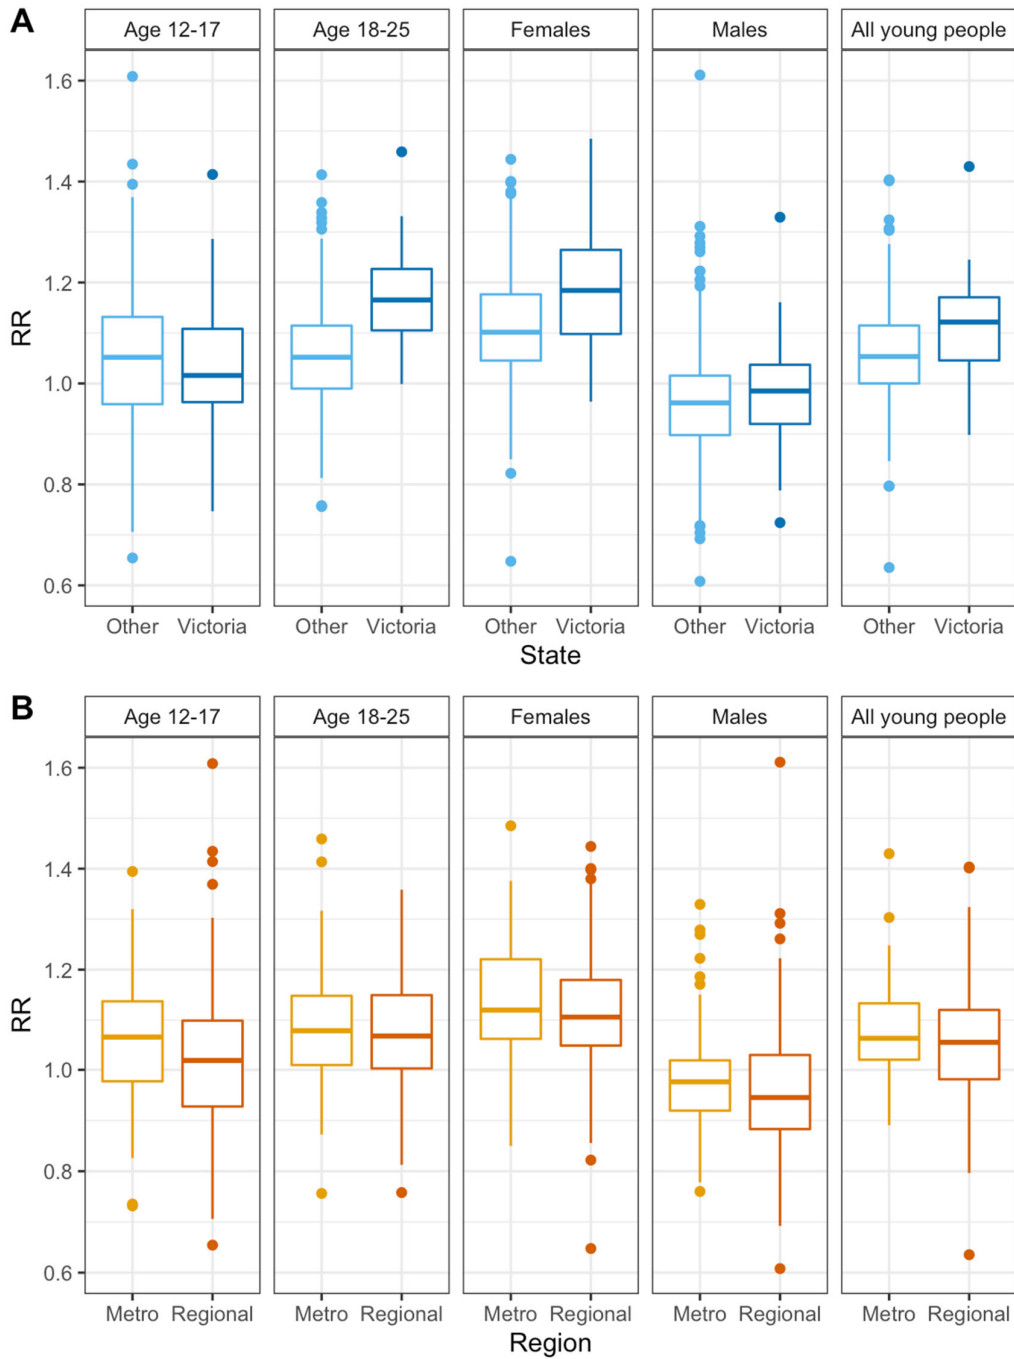

**Figure S6**

Sensitivity analysis of pooled COVID-19 interruption effect estimated from interrupted time series models for individual SA3 areas (using random effects meta-analysis) by different subgroups ignoring temporal autocorrelation (excluding AR1).

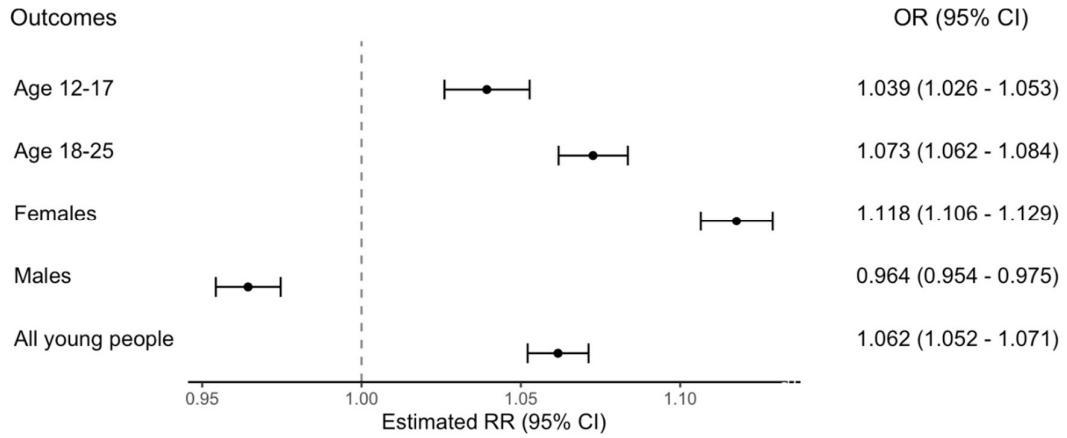

**Figure S7**

Sensitivity analysis of pooled COVID-19 interruption effect estimated from interrupted time series models for individual SA3 areas (random effect meta-analysis) by different subgroups using data from 2011 to 2020.

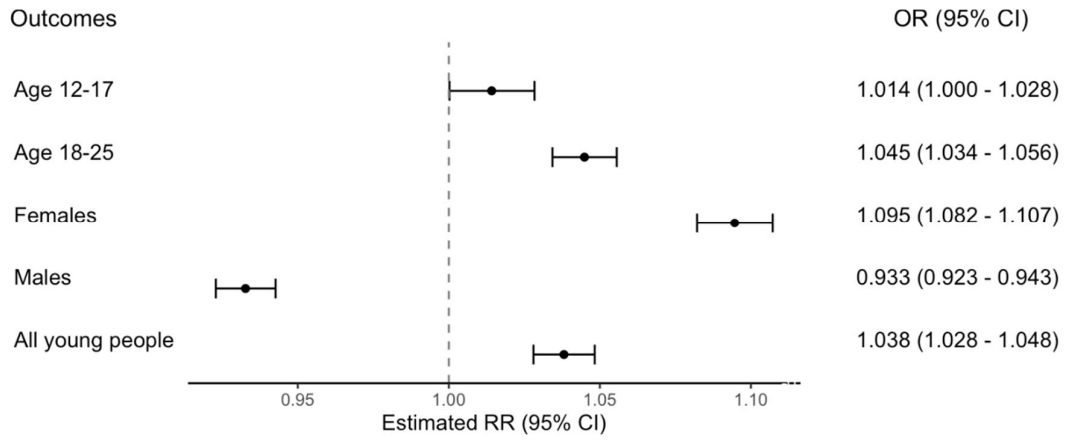

## References

1. Wedderburn RWM: Quasi-likelihood functions, generalized linear models, and the Gauss—Newton method. *Biometrika* 61:439-47, 1974
2. Box GEP, Pierce DA: Distribution of Residual Autocorrelations in Autoregressive-Integrated Moving Average Time Series Models. *Journal of the American Statistical Association* 65:1509-26, 1970
3. Davis RA, Williams TMD, Wang Y: On Autocorrelation in a Poisson Regression Model. *Biometrika* 87:491-505, 2000
4. Corbeil RR, Searle SR: Restricted Maximum Likelihood (REML) Estimation of Variance Components in the Mixed Model. *Technometrics* 18:31-8, 1976
5. IntHout J, Ioannidis JPA, Borm GF: The Hartung-Knapp-Sidik-Jonkman method for random effects meta-analysis is straightforward and considerably outperforms the standard DerSimonian-Laird method. *BMC Medical Research Methodology* 14:25, 2014
6. Cole SR, Chu H, Greenland S: Maximum likelihood, profile likelihood, and penalized likelihood: a primer. *Am J Epidemiol* 179:252-60, 2014
